# ***Enterococcus faecalis* AHG0090 is a genetically tractable bacterium and produces a secreted peptidic bioactive that suppresses NF- $\kappa$ B activation in human gut epithelial cells**

**Páraic Ó Cuív<sup>1\*</sup>, Rabina Giri<sup>2</sup>, Emily C. Hoedt<sup>1</sup>, Michael A. McGuckin<sup>2</sup>, Jakob Begun<sup>2</sup> and Mark Morrison<sup>1</sup>**

<sup>1</sup>The University of Queensland Diamantina Institute, The University of Queensland, Translational Research Institute, Brisbane, QLD, Australia

<sup>2</sup>Mater Research Institute – The University of Queensland, Translational Research Institute, Brisbane, QLD, Australia

## **\* Correspondence:**

**Páraic Ó Cuív (P. Ó C)**

**E-mail: [p.ocuiv@uq.edu.au](mailto:p.ocuiv@uq.edu.au)**

**T: +61 7 3443 6935**

**Keywords: Gut microbiota, *Enterococcus faecalis*, Metaparental mating, Plasmid, Genetic, *Faecalibacterium prausnitzii*, NF-kappa B, Peptide, Bioactive**

## **Abstract**

*Enterococcus faecalis* is an early coloniser of the human infant gut and contributes to the development of intestinal immunity. To better understand the functional capacity of *E. faecalis* we constructed a broad host range RP4 mobilisable vector, pEHR513112, that confers chloramphenicol resistance and used a metaparental mating approach to isolate *E. faecalis* AHG0090 from a faecal sample collected from a healthy human infant. We demonstrated that *E. faecalis* AHG0090 is genetically tractable and could be manipulated using traditional molecular microbiology approaches. *E. faecalis* AHG0090 was comparable to the gold-standard anti-inflammatory bacterium *Faecalibacterium prausnitzii* A2-165 in its ability to suppress cytokine mediated NF- $\kappa$ B activation in human gut derived LS174T goblet cell-like and Caco-2 enterocyte-like cell lines. *E. faecalis* AHG0090 and *F. prausnitzii* A2-165 produced secreted low molecular weight NF- $\kappa$ B suppressive peptidic bioactives. Both bioactives were sensitive to heat and proteinase K treatments although the *E. faecalis* AHG0090 bioactive was more resilient to both forms of treatment. As expected, *E. faecalis* AHG0090 suppressed IL-1 $\beta$  induced NF- $\kappa$ B-p65 subunit nuclear translocation and expression of the NF- $\kappa$ B regulated genes IL-6, IL-8 and CXCL-10. Finally, we determined that *E. faecalis* AHG0090 is distantly related to other commensal strains and likely encodes niche factors that support effective colonisation of the infant gut.

## **Introduction**

The human gut represents the largest mucosal surface area and is the largest immune organ of the body (Chassaing et al., 2014). Full-term infants are born with a competent but immature immune system that must respond appropriately to the inevitable exposure to microbes that occurs following birth. The infant microbiota is derived principally from the maternal microbiota (Dominguez-Bello et al., 2010) and the early colonisers of the gut play a critical role in priming mucosal immunity and establishing a homeostatic relationship with the host (Chung and Kasper, 2010; Fulde and Hornef, 2014).

39 *Enterococcus faecalis* is one of the most abundant colonisers of the infant gastrointestinal tract  
40 (Hopkins et al., 2005;Kirtzalidou et al., 2012) and together with other Enterococci, Staphylococci and  
41 Enterobacteria helps reduce the gut environment to facilitate subsequent colonisation by obligate  
42 anaerobes (Adlerberth, 2008;Wopereis et al., 2014). Select *E. faecalis* infant derived strains also  
43 possess immunomodulatory capacities (Wang et al., 2008) and exert anti-inflammatory activities by  
44 modulating the nuclear factors kappa B (NF- $\kappa$ B), mitogen activated protein kinase and peroxisome  
45 proliferator-activated receptor- $\gamma$ 1 regulated pathways (Are et al., 2008;Wang et al., 2014). Some of  
46 the immunomodulatory factors produced by *E. faecalis* have been identified (Brosnahan et al.,  
47 2013;Zou et al., 2014;Im et al., 2015) however the extent of immunomodulatory capacities amongst  
48 non-pathogenic gut strains, and the identity of the bioactives that underpin them, remains largely  
49 unknown.

50 Taken together, we hypothesised the infant gut microbiota would be a fertile source of  
51 immunomodulatory bioactive factors with potential prophylactic or therapeutic applications. We  
52 previously reported a method termed metaparental mating that enables the rapid and directed isolation  
53 of genetically tractable human gut bacteria (Ó Cuív et al., 2015). In this study, we describe the isolation  
54 of *E. faecalis* AHG0090 and demonstrate that similar to *Faecalibacterium prausnitzii* A2-165  
55 (Quevrain et al., 2016;Breyner et al., 2017), it produces a potent peptidic bioactive that suppresses NF-  
56  $\kappa$ B activation. Finally, we demonstrate that *E. faecalis* AHG0090 can be manipulated using traditional  
57 molecular techniques providing new opportunities to dissect the functional capacity of the human gut  
58 microbiota.

## 59 **Materials & Methods**

60 **Growth and culture conditions.** The recipient cultures for metaparental mating were prepared by  
61 inoculating Brain Heart Infusion (BHI, Difco™) supplemented with colistin sulfate with a raw stool  
62 sample collected from a healthy 2-year-old female child. The donor had not taken antibiotics during  
63 the 3-month period prior to collection. The child was recruited as part of a study into the link between  
64 the gut microbiota and type 1 diabetes susceptibility. All study samples were collected in accordance  
65 with the recommendations of the Mater Health Services Human Research Ethics Committee  
66 (HREC/13/MHS/21/AM02). All subjects gave written informed consent in accordance with the  
67 Declaration of Helsinki, with written consent provided from parents or legal guardians for all subjects  
68 <13 years. The protocol was approved by the Mater Health Services Human Research Ethics  
69 Committee. *E. faecalis* was cultured in BHI and the *Escherichia coli* ST18 donor strain for  
70 metaparental mating was cultured in BHI supplemented with  $\delta$ -aminolevulinic acid (100  $\mu$ g.ml<sup>-1</sup>). The  
71 *E. coli* cloning strains were grown in LB and *F. prausnitzii* A2-165 was cultured in anaerobic  
72 Reinforced Clostridial Medium (RCM, Oxoid™) buffered with salt solutions 2 and 3 (McSweeney et  
73 al., 2005). *F. prausnitzii* cultures were routinely manipulated in a Coy vinyl anaerobic chamber with  
74 an oxygen free atmosphere (85% N<sub>2</sub>:10% CO<sub>2</sub>:5% H<sub>2</sub>). Both *E. coli* ST18 and JM109 competent cells  
75 were prepared by the rubidium chloride method (Hanahan, 1985) while Invitrogen™ *E. coli* INV $\alpha$ F'  
76 competent cells were purchased from ThermoFisher Scientific. The bacterial growth media were  
77 supplemented with erythromycin (100  $\mu$ g.ml<sup>-1</sup>), chloramphenicol (20  $\mu$ g.ml<sup>-1</sup>) or colistin sulfate (20  
78  $\mu$ g.ml<sup>-1</sup>) as appropriate.

79 Bacterial growth was measured by the increase in optical density at 600 nm (OD<sub>600nm</sub>). Specific growth  
80 rates ( $\mu$  [hours<sup>-1</sup>]) were calculated by log<sub>10</sub> transformation of the OD<sub>600nm</sub> measurements and plotting a  
81 trendline (R<sup>2</sup>>0.97) for the linear phase of growth corresponding to exponential growth phase. Then  
82  $\mu$  was calculated using the equation:  $\mu = (\text{slope of the line} * 2.3)$ .

83 **Vector construction and manipulation.** To construct pEHR513111, *catP* was PCR amplified from  
84 pJIR1456 (Lyras and Rood, 1998) with primers (P<sub>f</sub> 5' GAT CGT TTA AAC AGT GGG CAA GTT  
85 GAA AAA TTC AC; P<sub>r</sub> 5' GAT CCC TGC AGG TTA GGG TAA CAA AAA ACA CCG TAT TTC  
86 TAC) that introduced unique PmeI and SbfI restriction sites. The digested *catP* was then cloned into  
87 pEHR512111, replacing *erm*, and generating pEHR513111. The pEHR513112 vector was  
88 subsequently constructed by cloning *cphy\_3290-evolglow-C-Bs2* from pEHR512112 (Ó Cuív et al.,  
89 2015) into the multiple cloning site of pEHR513111 as an EcoRI-HindIII fragment. The pEHR513111  
90 and pEHR513112 vectors were confirmed by restriction digest analysis and the sequences compiled  
91 using publicly available sequences. When appropriate, the pEHR513112 vector was cured from *E.*  
92 *faecalis* AHG0090 by overnight growth in BHI medium supplemented with acridine orange (1-8 µg.ml<sup>-1</sup>)  
93 and then plating on BHI medium. Single colonies were replica plated onto BHI medium with or  
94 without chloramphenicol to identify naïve *E. faecalis* AHG0090 isolates.

95 Plasmid DNA was extracted from *E. faecalis* cultures using a modified alkaline lysis method (Green  
96 and Sambrook, 2016). Briefly, 1 ml of *E. faecalis* culture was centrifuged and the cells were  
97 resuspended in 200 µl of Solution 1. The cell suspension was supplemented with 1 µl of mutanolysin  
98 (20 U/µl) and 10 µl lysozyme (200 mg/ml) and incubated at 37°C for up to 1 hour. Next, 200 µl of  
99 Solution 2 was added, and the mixture was incubated on ice for 5 min. Then, 200 µl of Solution 3 was  
100 added, and the mixture was incubated on ice for 10 min. The cell debris were removed by  
101 centrifugation and the clarified cell lysate was recovered and extracted with  
102 phenol:chloroform:isoamylalcohol (25:24:1). The aqueous phase was transferred to a fresh tube and  
103 plasmid DNA was precipitated using isopropanol, washed with 70% (v/v) ethanol and then  
104 resuspended in TE buffer. Plasmid DNA was similarly prepared from *E. coli* except that the treatments  
105 with mutanolysin and lysozyme, and the incubations on ice were not performed.

106 **Mating procedures.** The *E. coli* ST18 donor strain for metaparental and bi-parental matings was  
107 grown in BHI medium supplemented with δ-aminolevulinic acid and chloramphenicol. The  
108 metaparental mating experiments were performed essentially as previously described (Ó Cuív et al.,  
109 2015) with two exceptions. First, the mating mix and controls were spotted directly onto the surface  
110 of BHI agar rather than plating on a nylon filter. Second, 100 µl of mating mix and controls were  
111 transferred to fresh BHI broth and grown for 5 hours before selecting for transconjugants. Biparental  
112 matings were similarly performed except that the 5 hour outgrowth was not done. Transconjugants  
113 were recovered on BHI medium supplemented with chloramphenicol and colisin sulfate.

114 **Microscopy.** Naïve and transconjugants strains of *E. faecalis* AHG0090 were examined with an  
115 Olympus BX 63 microscope fitted with an Xcite LED light source and fluorescence filter cube U-FBN  
116 (excitation 470–495 nm, emission 510 nm). Images were captured using a DP80 camera and the  
117 Olympus cellSens modular imaging software platform and ImageJ software package  
118 (<http://imagej.nih.gov/ij/>) were used for visualisation and processing.

119 ***E. faecalis* rrs sequencing.** The *rrs* gene was PCR amplified using the primers 27F and 1492R (Lane,  
120 1990) as previously described (Ó Cuív et al., 2011) and sequenced at the Australian Genomic Research  
121 Facility (Brisbane, Australia) using primers 530F and 907R (Lane, 1990). The individual sequence  
122 reads were trimmed to remove low quality bases and assembled using deFUME (van der Helm et al.,  
123 2015). The assembled sequence was then aligned against the Ribosomal Database Project (Cole et al.,  
124 2014) core set of aligned *rrs* sequences and *E. faecalis* AHG0090 was identified using the Classifier  
125 and SeqMatch functions.

126 **Genome sequencing and analysis.** High molecular weight DNA was prepared from the *E. faecalis*  
127 AHG0090 metaparental mating isolate as previously described (Ó Cuív et al., 2011). The DNA was  
128 then quantified using the QuantiFluor ONE dsDNA system according to manufacturer's instructions  
129 (Promega, Australia) and the integrity of the DNA was determined by agarose gel electrophoresis. The  
130 genome was shotgun sequenced using the Illumina NextSeq 500 system (2 x 150bp High Output kit)  
131 with v2 chemistry. The sequence data were quality checked, filtered and then *de novo* assembled using  
132 the SPAdes assembler v 3.10.1 (Bankevich et al., 2012). Genome sequencing quality was evaluated  
133 with CheckM, which estimates the input files for completeness and contamination based on the  
134 phylogenetic assignment of a broad set of marker genes (Parks et al., 2015). The *E. faecalis* AHG0090  
135 contigs were ordered using Mauve (Darling et al., 2010) with the closed *E. faecalis* V583 genome  
136 sequence used as a reference. The Mauve generated assembly was submitted to the RAST annotation  
137 pipeline and the results were examined in the SEED Viewer (Aziz et al., 2008). Genome based  
138 phylogeny was obtained using GTDB (<https://github.com/ECogenomics/GTDBLite>), built from the  
139 concatenation of 120 universal bacterial-specific marker genes (Parks et al., 2017). Tree inference was  
140 performed with FastTree v2.1.7 (Price et al., 2010) and included all genomes in IMG v4.510  
141 (Markowitz et al., 2012). The resulting tree was imaged using ARB v6.0.6 (Ludwig et al., 2004). To  
142 identify candidate plasmids, the fastq files were mapped to the *E. faecalis* AHG0090 genome assembly  
143 using BamM v1.7.3 (<http://ecogenomics.github.io/BamM/>) to determine the coverage profiles for each  
144 contig. The average coverage was then calculated and contigs with >1000x coverage were identified  
145 as candidate plasmids. Additionally, we used PlasmidSPAdes to assemble plasmids from whole  
146 genome sequencing data (Antipov et al., 2016). The candidate plasmids were manually curated to  
147 determine if they could be closed and compared to other plasmids using Blastn. This Whole Genome  
148 Shotgun project was deposited at DDBJ/EMBL/GenBank under the accession PDUN00000000. The  
149 version described in this paper is the first version, PDUN01000000.

150 **Measurement of *E. faecalis* immunomodulatory activities.** The immunomodulatory potential of *E.*  
151 *faecalis* was assessed using LS174T-NF- $\kappa$ Bluc goblet cell like and Caco-2-NF- $\kappa$ Bluc enterocyte like  
152 reporter cell lines (Ó Cuív et al., 2017). Briefly, three individual *E. faecalis* AHG0090 colonies were  
153 established as independent cultures with BHI broth. Following overnight growth, each individual  
154 culture was used to initiate duplicate 50 ml BHI broth cultures at a starting OD<sub>600nm</sub> of 0.01 (n=6  
155 cultures, consisting of n=3 independent biological replicates with n=2 technical replicates each). The  
156 OD<sub>600nm</sub> of the cultures was monitored longitudinally and 5 ml of cultures was harvested from each  
157 broth culture at early exponential, mid-exponential, early stationary and late stationary phase of growth.  
158 At each collection, 1.5 ml of each culture was centrifuged at 16,000 x g for 5 minutes and 0.5 ml of the  
159 cell-free supernatant fraction was transferred to fresh tubes and stored at -30°C as single-use aliquots.

160 For the immunomodulatory assays, 96-well microtiter plates were seeded with 20,000 LS174T-NF-  
161  $\kappa$ Bluc or Caco-2-NF- $\kappa$ Bluc reporter cells per well as previously described (Ó Cuív et al., 2017). The  
162 ability of the cell free bacterial supernatants to suppress NF- $\kappa$ B activation in LS174T-NF- $\kappa$ Bluc was  
163 assessed by adding supernatant (10% v/v in complete DMEM medium) to the cells and incubating for  
164 30 minutes at 37°C. The LS174T and Caco-2 reporter cell lines were then stimulated with TNF $\alpha$   
165 (25ng.ml<sup>-1</sup>) or IL-1 $\beta$  (50 ng.ml<sup>-1</sup>) respectively in the presence of 10% v/v supernatant for 4 hours before  
166 assessing luciferase activity. The ability of the supernatants to suppress activation was compared to  
167 the NF- $\kappa$ B inhibitor indole-3-carbinol (I3C, 5  $\mu$ M). NF- $\kappa$ B driven luciferase expression was assessed  
168 using the Pierce™ Firefly Luc One-Step Glow Assay Kit (ThermoFisher Scientific) according to the  
169 manufacturer's instructions. The cytotoxicity of the supernatants was assessed using Cell Proliferation  
170 Reagent WST-1 (Sigma Aldirch) according to the manufacturer's instructions.

171 **Nuclear translocation immunofluorescence assays.** Glass coverslips in a 12 well-plate were seeded  
172 with 20,000 Caco-2 cells per well and cultured overnight. Cell-free culture supernatants harvested  
173 from mid-exponential phase cultures were added (10% v/v) to the Caco-2 cells and incubated for 30  
174 min, and then stimulated with IL-1 $\beta$  (25ng.ml<sup>-1</sup>) for 1 hour. Cells were also treated with BHI medium  
175 and I3C alone. The cells were then processed and analysed as previously described (Ó Cuív et al.,  
176 2017).

177 **Quantitative reverse transcriptase PCR (qRT-PCR) assays.** A 12 well-plate was seeded with  
178 50,000 Caco-2 cells per well and cultured overnight. Cell-free culture supernatants harvested from  
179 mid-exponential phase cultures were added (10% v/v) to the Caco-2 cells and incubated for 30 min,  
180 and then stimulated with IL-1 $\beta$  (25ng.ml<sup>-1</sup>) for 6 hours. Cells were also treated with I3C and BHI  
181 medium alone. Total RNA was isolated and the expression of the NF- $\kappa$ B dependent genes IL-6, IL-8  
182 and CXCL10 was assessed as previously described (Ó Cuív et al., 2017), except that different primers  
183 were used for IL-6 (P<sub>f</sub> 5' CCA CTC ACC TCT TCA GAA CG; P<sub>r</sub> 5' CAT CTT TGG AAG GTT CAG  
184 GTT G) (Noss et al., 2015).

## 185 **Results**

186 **Isolation of *E. faecalis* AHG0090.** To recover genetically tractable facultative anaerobic *Firmicutes*  
187 bacteria from the healthy infant human gut we produced a microbial enrichment culture from human  
188 stool and determined that the addition of chloramphenicol completely inhibited growth of candidate  
189 recipients on BHI medium under aerobic conditions. Consequently, we constructed a vector,  
190 pEHR513111, carrying *catP* and this vector was further modified by cloning the *evoglow-C-Bs2* under  
191 the control of the *Clostridium phytofermentans* ISDg *cphy\_3290* promoter generating pEHR513112  
192 (Figure 1A).

193 Following metaparental mating we recovered 14 transconjugants and assessed the clonality of 12  
194 isolates by plasmid profiling. All 12 isolates carried a plasmid of comparable molecular weight to  
195 pEHR513112 in addition to at least two other plasmids (~1.4 kb closed covalent circular form, ~3.2 kb  
196 closed covalent circular form) (Figure 1B). However, the plasmid DNA profiles of all 12 isolates were  
197 virtually identical suggesting they were clonal. Based on these observations we chose one  
198 transconjugant for further analysis and produced 1473 bp of 16S rRNA sequence. Based on this  
199 sequence we determined the isolate was affiliated with the *Enterococcus faecalis* taxon, and hereafter  
200 it is referred to as *E. faecalis* AHG0090.

201 ***E. faecalis* AHG0090 is genetically tractable.** We examined whether *E. faecalis* AHG0090 can be  
202 genetically manipulated using traditional techniques in molecular microbiology. *E. faecalis* AHG0090  
203 was grown in BHI broth supplemented with acridine orange to cure pEHR513112. The addition of  
204 acridine orange up to 8  $\mu$ g.ml<sup>-1</sup> did not affect growth however all the colonies recovered on BHI  
205 medium were sensitive to chloramphenicol suggesting they had lost pEHR513112. Plasmid DNA  
206 prepared from *E. faecalis* AHG0090 recovered by metaparental mating carried a plasmid with the same  
207 molecular weight as pEHR513112 however, this plasmid was absent from naïve *E. faecalis* AHG0090  
208 (Figure 2A). We next confirmed that naïve *E. faecalis* AHG0090 was genetically tractable by using it  
209 as the recipient in a biparental mating with *E. coli* ST18 carrying pEHR513112. Using our standard  
210 biparental mating protocol we recovered transconjugants and achieved a conjugation efficiency of 3.83  
211 x 10<sup>-7</sup> transconjugants per recipient. As expected, the biparental mating derived transconjugant carried  
212 the pEHR513112 plasmid band (Figure 2A) and plasmid recovery experiments from the metaparental  
213 mating and re-transformed isolates confirmed the plasmids were stably maintained (Figure 2B).  
214 Consistent with these observations the re-transformed but not naïve strain was fluorescent (Figure 2C).

215 Notably, the endogenous plasmids were unaffected by the acridine orange treatment suggesting that  
216 they are stably maintained.

217 ***E. faecalis* AHG0090 produces an NF- $\kappa$ B suppressive peptidic bioactive.** Given the  
218 immunomodulatory activity previously ascribed to *E. faecalis* isolates we examined the ability of *E.*  
219 *faecalis* AHG0090 to suppress cytokine mediated epithelial NF- $\kappa$ B activation using our LS174T and  
220 Caco-2 reporter cell lines. *E. faecalis* AHG0090 was grown in BHI medium and achieved a specific  
221 growth rate of  $1.63 \pm 0.14 \text{ h}^{-1}$  (Growth rate  $\pm$ SD) during exponential growth phase and a maximum  
222 recorded yield of  $3.74 \pm 0.07$  (OD<sub>600</sub>  $\pm$ SD) following 8 hours of growth (Figure 3A). Cell free  
223 supernatants were harvested from early exponential, mid-exponential, early stationary and late  
224 stationary phase cultures as the closely related bacterium *Lactobacillus plantarum* produces  
225 immunomodulins that inhibit IFN $\gamma$  production in a growth phase dependent manner (Zvanych et al.,  
226 2014). Culture supernatant harvested from all four-time points suppressed NF- $\kappa$ B activation in both  
227 cell lines although the extent of suppression was greatest with supernatants harvested from mid-  
228 exponential phase onward (Figure 3B).

229 We compared the NF- $\kappa$ B suppressive capacity of *E. faecalis* AHG0090 to the model anti-inflammatory  
230 gut bacterium *F. prausnitzii* A2-165 and determined that both strains suppressed NF- $\kappa$ B activation to  
231 a similar extent in the LS174T and Caco-2 reporter cell lines (Figure 4A). Critically, the *E. faecalis*  
232 AHG0090 and *F. prausnitzii* A2-165 cell free supernatants did not exert cytotoxic effects. The *E.*  
233 *faecalis* AHG0090 culture supernatant was fractionated by passing it through a 3 kDa molecular weight  
234 cut-off filter and the NF- $\kappa$ B suppressive activity of the flow-through but not the retentate was similar  
235 to that of the unfractionated culture supernatant (Figure 4A,  $p > 0.05$ ). We next assessed the impact of  
236 heat and proteinase K treatments on the *F. prausnitzii* A2-165 and *E. faecalis* AHG0090 NF- $\kappa$ B  
237 suppressive bioactives. The activity of the *F. prausnitzii* A2-165  $< 3$  kDa culture supernatant fraction  
238 was not significantly different to the RCM control following heat (57 and 97°C) or proteinase K  
239 treatment (Figure 4B,  $p > 0.05$ ), consistent with the NF- $\kappa$ B suppressive capacity of this bacterium being  
240 mediated by Mam derived peptides (Quevrain et al., 2016). The *E. faecalis* AHG0090  $< 3$  kDa culture  
241 supernatant fraction displayed similar characteristics but still retained activity following treatment at  
242 57°C for 30 min or proteinase K digestion for 1 hour when compared to the BHI control (Figure 4B,  
243  $p < 0.05$ ). This activity was lost at higher temperatures or following longer heat treatment, and following  
244 extended proteinase K treatment (Figure 4B,  $p > 0.05$ ). Taken together, these data suggest *E. faecalis*  
245 AHG0090 secretes a low molecular weight NF- $\kappa$ B suppressive peptidic bioactive with differing  
246 properties to the *F. prausnitzii* Mam peptides.

247 ***E. faecalis* AHG0090 inhibits NF- $\kappa$ B-p65 subunit nuclear translocation and cytokine expression.**  
248 Cytokine mediate activation of the NF- $\kappa$ B pathway results in nuclear translocation of the NF- $\kappa$ B-p65  
249 subunit. We examined the ability of culture supernatant harvested from mid-exponential phase cultures  
250 of *E. faecalis* AHG0090 to suppress NF- $\kappa$ B-p65 subunit nuclear translocation. NF- $\kappa$ B-p65 subunit  
251 nuclear translocation induced by IL-1 $\beta$  in Caco-2 cells was unaffected by treatment with BHI medium.  
252 In contrast, *E. faecalis* AHG0090 mid-exponential phase culture supernatant treatment significantly  
253 reduced nuclear translocation in a similar fashion to the pharmacological inhibitor I3C (Figure 5A).  
254 As expected, I3C and *E. faecalis* AHG0090 culture supernatant suppressed expression of the NF-  
255  $\kappa$ B dependent genes IL-6 ( $p < 0.05$ ), IL-8 ( $p < 0.01$ ) and CXCL10 ( $p < 0.001$ ), as determined by qRT-PCR  
256 (Figure 5B).

257 ***E. faecalis* AHG0090 is adapted for gut colonisation.** We sequenced the *E. faecalis* AHG0090  
258 genome to provide insights into the factors supporting colonisation and persistence in the infant gut.

259 We produced 2,925,542 bp of DNA sequence at 107x coverage. The sequenced data was assembled  
260 into 116 contigs providing a contig N<sub>50</sub> of 144,336 bp and L<sub>50</sub> of 8. Critically, the genome was assessed  
261 by CheckM as being essentially complete (99.63%) and free from contamination. The genome has a  
262 G+C content of 37.3% and is predicted to contain 2,929 protein-coding genes and 60 structural RNAs.  
263 Analysis of *E. faecalis* phylogeny using the GTDB revealed that *E. faecalis* AHG0090 clusters closely  
264 with three strains termed *E. faecalis* TX0630, TX0635 and TX0645, and distally from the *E. faecalis*  
265 type strains (*E. faecalis* ATCC19433 and 29200), and other gut commensal (e.g. *E. faecalis* PC1.1, 62  
266 and Symbioflor1) and pathogenic (*E. faecalis* V583) strains (Figure 6A). Although *E. faecalis* is  
267 characterised by extensive horizontal gene transfer there is a high degree of synteny between *E. faecalis*  
268 AHG0090 and the closed commensal (*E. faecalis* 62) and pathogenic (*E. faecalis* V583) strains (Figure  
269 6B).

270 We identified several plasmids in the *E. faecalis* AHG0090 genome sequence. pAHG0090c is a  
271 predicted to be 76,529 bp and is comprised of 11 contigs. It is predicted to encode 80 genes and  
272 displays sequence similarity and synteny to another plasmid from *E. faecalis* NKH15 (pMG2200  
273 [106,527 bp], 99% identity and 72% coverage). Enterococcal plasmids are widely shared through  
274 horizontal transfer and we identified an aggregation substance encoding regulon that mediates efficient  
275 contact between donor and recipient bacteria to facilitate plasmid transfer (Bhatty et al., 2015), and  
276 adhesion to host cells (Olmsted et al., 1994; Vanek et al., 1999). We also identified two closed  
277 endogenous plasmid sequences in the genome sequence data. pAHG0090b is a 5,121 bp plasmid that  
278 exhibits sequence similarity to plasmids from *E. faecalis* 62 (EF62pA [5,143 bp], 99% identity and  
279 100% coverage) (Brede et al., 2011) and *E. faecalis* S-86 (pS86 [5,149 bp], 99% identity and 99%  
280 coverage) (Martinez-Bueno et al., 2000). pAHG0090b has a G+C content of 37% and is predicted to  
281 encode 6 proteins. pAHG0090a is a 1,925 bp plasmid that exhibits extensive sequence similarity to a  
282 cryptic plasmid of similar size from *Enterococcus faecium* 226 (pMBB1 [1,932 bp], 96% identity and  
283 67% coverage) (Wyckoff et al., 1996), and larger cryptic plasmids from *Lactococcus fermentum* KC5b  
284 (pKC5b [4,392 bp], 99% identity and 75% coverage) (Pavlova et al., 2002) and *Lactococcus lactis*  
285 (pCRL291.1 [4,640 bp], 89% identity and 70% coverage). pAHG0090a has a G+C content of 33%  
286 and is predicted to encode a single protein predicted to function in plasmid replication.

287 We also identified pEHR513112 in the genome sequence. There were 4 differences between the  
288 compiled pEHR513112 sequence and the vector carried by *E. faecalis* AHG0090. We identified a  
289 G86T transversion in the *cphy\_3290* promoter and a C240T transition in *oriT* vector modules. We  
290 also identified a 1 bp deletion at the 5' (AscI) end and a separate 11 bp deletion at the 3' (PmeI) end of  
291 the pMB1 module. Notably, these deletions occurred within the primer sequences used to PCR amplify  
292 the pMB1 module.

293 The *E. faecalis* AHG0090 chromosome is predicted to encode a range of niche factors that likely  
294 support colonisation and persistence in the infant gut. Many Enterococci are non-motile and the ability  
295 to adhere to the host epithelium likely plays a role in preventing wash-out. We identified an Ebp-like  
296 pilus, the microbial surface component recognizing adhesive matrix molecules protein Ace and several  
297 adhesins including EfbA that mediate adhesion to host structural factors (e.g. collagen, fibrinogen and  
298 laminin) and support biofilm formation (Nallapareddy et al., 2000; Montealegre et al., 2015; Singh et  
299 al., 2015). *E. faecalis* AHG0090 also encodes several proteins that enable foraging of host glycans  
300 (Bohle et al., 2011; Garbe et al., 2014) and it also encodes both the GelE and SprE proteases that have  
301 been proposed to support the nutrient requirements of the bacterium by digesting host proteins and  
302 cells (Fisher and Phillips, 2009). We also identified several proteins that likely modulate interactions  
303 with the host immune system including an internalin like protein that may support intracellular  
304 persistence (Brinster et al., 2007) and a capsule that may contribute to immune evasion (Thurlow et

305 al., 2009). Notably, we also identified a TIR domain protein previously shown to suppress MyD88  
306 signalling and NF- $\kappa$ B activation by *E. faecalis* V583 (Zou et al., 2014). As expected, *E. faecalis*  
307 AHG0090 does not encode Mam like sequences and we did not identify any candidate genes and/or  
308 regulons likely to encode a low molecular weight NF- $\kappa$ B suppressive peptidic bioactive (e.g.  
309 bacteriocin CBT-SL5((Lee et al., 2008), the *E. faecalis* SL-5 bacteriocin CBT-SL5 is likely same as  
310 bacteriocin ESL5 which is produced by the same strain (Kang et al., 2009)) such as the bioactive we  
311 describe.

## 312 Discussion

313 The early microbial colonisers of the gut help establish a homeostatic relationship between the host  
314 and its microbiota (Battersby and Gibbons, 2013;Fulde and Hornef, 2014). *E. faecalis* comprises part  
315 of the vaginal (Brosnahan et al., 2013;Nami et al., 2014) and breastmilk (Jimenez et al.,  
316 2008;Albesharat et al., 2011;Kozak et al., 2015) microbiota, and is widely shared between mothers and  
317 their infants. It is increasingly recognised that early life events (e.g. method of birth, feeding) modify  
318 risks for several chronic diseases (Renz-Polster et al., 2005;Ng et al., 2015) and this may be related at  
319 least in part to early differences in gut colonisation and immune modulation. Much remains to be  
320 discovered about the bacteria and bioactive factors that underpin these events, and whether they could  
321 be exploited to optimise health and appropriate establishment of gut mucosal immunity.

322 In this study, we describe the isolation of a genetically tractable *E. faecalis* strain from infant stool and  
323 demonstrate that it produces a potent NF- $\kappa$ B suppressive bioactive. The suppressive activity of *E.*  
324 *faecalis* AHG0090 was clearly apparent in early exponential phase culture supernatants and did not  
325 increase significantly from mid-exponential phase onward. This suggests the bioactive is produced in  
326 early growth and persists in the culture supernatant through the proceeding phases of growth. The  
327 closely related bacterium *Lactobacillus plantarum* WCFS1 also exerts NF- $\kappa$ B and IFN $\gamma$  suppressive  
328 effects and produces bioactives in a growth phase dependent manner (van Baarlen et al., 2009;Zvanych  
329 et al., 2014), possibly as a response of the bacterium to increased nutrient limitation during the  
330 transition from mid-log to stationary phase. We determined that the ability of *E. faecalis* AHG0090 to  
331 suppress NF- $\kappa$ B in our reporter cell lines was comparable to that of *F. prausnitzii* A2-165. *F.*  
332 *prausnitzii* is widely regarded as a model anti-inflammatory fastidious gut bacterium and produces a  
333 15 kDa protein termed Mam that underpins NF- $\kappa$ B suppression (Quevrain et al., 2016;Breyner et al.,  
334 2017). Mam derived peptides are detectable in *F. prausnitzii* culture supernatants however it has not  
335 yet been reported whether the NF- $\kappa$ B suppressive activity is mediated by Mam and/or its peptide  
336 derivatives. While this remains to be further explored, we showed that NF- $\kappa$ B activation was  
337 suppressed by the <3 kDa culture supernatant fraction, and the suppressive effect was abrogated by  
338 heat or proteinase K treatment. Taken together, this suggests suppression of NF- $\kappa$ B by *F. prausnitzii*  
339 in our assays was mediated by <3 kDa Mam derived peptides. Our data also suggests that the NF- $\kappa$ B  
340 suppressive activity of *E. faecalis* AHG0090 is mediated by a low molecular weight peptidic bioactive  
341 although it is more resilient to heat and proteinase K treatment than Mam derived peptides.

342 The *E. faecalis* AHG0090 genome sequence allowed us to readily predict “known” functionalities.  
343 Both commensal and pathogenic strains of *E. faecalis* have previously been shown to produce NF- $\kappa$ B  
344 suppressive factors (Brosnahan et al., 2013;Zou et al., 2014). *E. faecalis* V583 encodes a TIR domain  
345 containing protein, TcpF, that suppresses NF- $\kappa$ B by interfering with MyD88 signalling (Zou et al.,  
346 2014). NF- $\kappa$ B suppression by TcpF is dependent on contact between the bacterium and host cells and  
347 this protein is also encoded by *E. faecalis* AHG0090 and other non-pathogenic isolates (e.g. *E. faecalis*  
348 PC1.1 (Ó Cuív et al., 2013), *E. faecalis* 62 (Brede et al., 2011)). Separately, the human vaginal isolate



349 *E. faecalis* MN1 produces an NF- $\kappa$ B suppressive tetramic acid termed reutericyclin (Brosnahan et al.,  
350 2013). The reutericyclin regulon has been described in *Lactobacillus reuteri* and includes a non-  
351 ribosomal peptide synthetase (NRPS) and polyketide synthetase (PKS) enzymes that function in its  
352 biosynthesis (Lin et al., 2015). *E. faecalis* AHG0090 does not encode the reutericyclin regulon and  
353 nor does it encode any NRPS or PKS genes. We did not identify any Mam like sequences which is  
354 consistent with its narrow phylogenetic distribution (Quevrain et al., 2016) nor did we identify any  
355 genes that might encode the candidate <3 kDa peptidic bioactive. It is increasingly facile to produce  
356 microbial genomic sequence data but the ability to link genes with function remains challenging. It is  
357 estimated that the human gut microbiome is comprised of as much as 9.8 million non-redundant genes  
358 (Li et al., 2014). However, despite the wealth of microbial (meta)genomic data that is now publicly  
359 available the vast majority of genes remain functionally uncharacterised (Anton et al., 2013; Dantas et  
360 al., 2013). For instance, it is widely acknowledged the gut microbiota exerts a broad range of  
361 immunomodulatory activities (e.g. (Geva-Zatorsky et al., 2017)) however, with some notable  
362 exceptions (Mazmanian et al., 2005; Quevrain et al., 2016), the genes underpinning these capacities  
363 remain largely cryptic.

364 Microbial culturing is a time consuming and labour-intensive process although this provides the best  
365 opportunity to link genes with function. We believe focusing culturing efforts on genetically tractable  
366 strains will ultimately expedite the functional dissection of the microbiome. We previously observed  
367 the pEHR plasmids are stably maintained in their recipient hosts (Ó Cuív et al., 2015). We have now  
368 demonstrated they are maintained in *E. faecalis* AHG0090 and that this strain can be manipulated using  
369 standard molecular microbiology approaches for transformation and plasmid curing. We did identify  
370 some minor differences between the compiled pEHR vector sequences and those produced from the  
371 genome sequence data and we believe that these likely occurred during the vector construction process.  
372 We are continuing to extend the functionalities of the pEHR vector system and we anticipate that this  
373 will enable us to apply forward and/or reverse genetic approaches to functionally dissect *E. faecalis*  
374 AHG0090 and other gut microbes. For instance, NF- $\kappa$ B is a master regulator of inflammation and gut  
375 barrier integrity, and is central to the pathogenesis of several chronic (gut) diseases (Atreya et al.,  
376 2008; Sakamoto and Maeda, 2010; Esser et al., 2015). The gut microbiota produces a plethora of  
377 immunomodulatory bioactives and these could be used as lead molecules to catalyse the development  
378 of new biotechnologies and therapeutics. Genetic methods offer new opportunities to identify these  
379 bioactives and they complement existing -omic based methods for gene and protein function discovery  
380 (Clarke et al., 2005; Meng et al., 2012).

381 In conclusion, we demonstrated that metaparental mating can be used to isolate genetically tractable  
382 bacteria from the human gut that possess potent anti-inflammatory activities. Although *E. faecalis* is  
383 amongst the best characterised *Firmicutes* affiliated gut bacteria our data suggests that this taxon  
384 possesses novel anti-inflammatory capacities. Several fastidious anaerobic gut bacteria have been  
385 suggested as next generation probiotics for chronic gut diseases but *E. faecalis* may be a superior  
386 candidate due to its ease of propagation. We anticipate that the genetic dissection of *E. faecalis*  
387 AHG0090 will provide new insights into the immunomodulatory capacity of this taxon, and a deeper  
388 understanding of the early life events that help establish a tolerogenic immune response.

### 389 **Author contributions**

390 PÓC conceived the study with MMcG, JB and MM; PÓC isolated *E. faecalis* AHG0090 and performed  
391 the genetic characterization; RG and PÓC prepared samples and performed the immunomodulatory  
392 characterizations; RG performed the immunofluorescence and gene expression experiments; ECH and

393 PÓC performed the genome analyses; PÓC, RG, ECH, MMcG, JB and MM analyzed the data, and;  
394 PÓC wrote the manuscript with RG, ECH, MMcG, JB and MM.

## 395 **Funding**

396 This research was supported via funds provided by the University of Faculty of Medicine (PÓC, JB  
397 and MM), the University of Queensland Diamantina Institute (MM) and the University of Queensland  
398 Microbiome Challenge Grant (MM and PÓC), as part of its contribution to the International Human  
399 Microbiome Consortium. PÓC is supported by The University of Queensland's Reginald Ferguson  
400 Fellowship in Gastroenterology. MMcG is supported by an NHMRC Senior Research Fellowship.  
401 The Translational Research Institute is supported by a grant from the Australian Government.

## 402 **Acknowledgements**

403 We gratefully acknowledge the Australian Centre for Ecogenomics for the library construction and  
404 genome sequencing, and Emma Hamilton-Williams for collecting the infant faecal sample.

## 405 **Conflict of interest**

406 The authors declare that the research was conducted in the absence of any commercial or financial  
407 relationships that could be construed as a potential conflict of interest.

## 408 **References**

- 409 **Adlerberth, I. (2008). Factors influencing the establishment of the intestinal microbiota in**  
410 **infancy. *Nestle Nutr Workshop Ser Pediatr Program* 62, 13-29; discussion 29-33.**
- 411 **Albesharat, R., Ehrmann, M.A., Korakli, M., Yazaji, S., and Vogel, R.F. (2011). Phenotypic**  
412 **and genotypic analyses of lactic acid bacteria in local fermented food, breast milk and**  
413 **faeces of mothers and their babies. *Systematic and Applied Microbiology* 34, 148-155.**
- 414 **Antipov, D., Hartwick, N., Shen, M., Raiko, M., Lapidus, A., and Pevzner, P.A. (2016).**  
415 **plasmidSPAdes: assembling plasmids from whole genome sequencing data.**  
416 ***Bioinformatics* 32, 3380-3387.**
- 417 **Anton, B.P., et al. (2013). The COMBREX project: design, methodology, and initial results.**  
418 ***PLoS Biol* 11, e1001638.**
- 419 **Are, A., et al. (2008). Enterococcus faecalis from newborn babies regulate endogenous PPAR $\gamma$**   
420 **activity and IL-10 levels in colonic epithelial cells. *Proceedings of the National Academy***  
421 ***of Sciences* 105, 1943-1948.**
- 422 **Atreya, I., Atreya, R., and Neurath, M.F. (2008). NF- $\kappa$ B in inflammatory bowel disease.**  
423 ***Journal of Internal Medicine* 263, 591-596.**
- 424 **Aziz, R.K., et al. (2008). The RAST Server: rapid annotations using subsystems technology.**  
425 ***BMC Genomics* 9, 75.**
- 426 **Bankevich, A., et al. (2012). SPAdes: a new genome assembly algorithm and its applications to**  
427 **single-cell sequencing. *J Comput Biol* 19, 455-477.**
- 428 **Battersby, A.J., and Gibbons, D.L. (2013). The gut mucosal immune system in the neonatal**  
429 **period. *Pediatric Allergy and Immunology* 24, 414-421.**
- 430 **Bhatty, M., et al. (2015). Enterococcus faecalis pCF10-encoded surface proteins PrgA, PrgB**  
431 **(aggregation substance) and PrgC contribute to plasmid transfer, biofilm formation and**  
432 **virulence. *Mol Microbiol* 95, 660-677.**

- 433 Bohle, L.A., Mathiesen, G., Vaaje-Kolstad, G., and Eijsink, V.G. (2011). An endo-beta-N-  
434 acetylglucosaminidase from *Enterococcus faecalis* V583 responsible for the hydrolysis of  
435 high-mannose and hybrid-type N-linked glycans. *FEMS Microbiol Lett* 325, 123-129.
- 436 Brede, D.A., Snipen, L.G., Ussery, D.W., Nederbragt, A.J., and Nes, I.F. (2011). Complete  
437 Genome Sequence of the Commensal *Enterococcus faecalis* 62, Isolated from a Healthy  
438 Norwegian Infant. *Journal of Bacteriology* 193, 2377-2378.
- 439 Breyner, N.M., et al. (2017). Microbial Anti-Inflammatory Molecule (MAM) from  
440 *Faecalibacterium prausnitzii* Shows a Protective Effect on DNBS and DSS-Induced  
441 Colitis Model in Mice through Inhibition of NF- $\kappa$ B Pathway. *Frontiers in Microbiology*  
442 8.
- 443 Brinster, S., et al. (2007). Enterococcal leucine-rich repeat-containing protein involved in  
444 virulence and host inflammatory response. *Infect Immun* 75, 4463-4471.
- 445 Brosnahan, A.J., Merriman, J.A., Salgado-Pabón, W., Ford, B., and Schlievert, P.M. (2013).  
446 *Enterococcus faecalis* Inhibits Superantigen Toxic Shock Syndrome Toxin-1-Induced  
447 Interleukin-8 from Human Vaginal Epithelial Cells through Tetramic Acids. *PLoS ONE*  
448 8, e61255.
- 449 Chassaing, B., Kumar, M., Baker, M.T., Singh, V., and Vijay-Kumar, M. (2014). Mammalian  
450 Gut Immunity. *Biomedical journal* 37, 246-258.
- 451 Chung, H., and Kasper, D.L. (2010). Microbiota-stimulated immune mechanisms to maintain  
452 gut homeostasis. *Curr Opin Immunol* 22, 455-460.
- 453 Clarke, P., Ó Cuív, P., and O'connell, M. (2005). Novel mobilizable prokaryotic two-hybrid  
454 system vectors for high-throughput protein interaction mapping in *Escherichia coli* by  
455 bacterial conjugation. *Nucleic Acids Res* 33, e18.
- 456 Cole, J.R., et al. (2014). Ribosomal Database Project: data and tools for high throughput rRNA  
457 analysis. *Nucleic Acids Res* 42, D633-642.
- 458 Dantas, G., Sommer, M.O., Degnan, P.H., and Goodman, A.L. (2013). Experimental  
459 approaches for defining functional roles of microbes in the human gut. *Annu Rev*  
460 *Microbiol* 67, 459-475.
- 461 Darling, A.E., Mau, B., and Perna, N.T. (2010). progressiveMauve: multiple genome alignment  
462 with gene gain, loss and rearrangement. *PLoS One* 5, e11147.
- 463 Dominguez-Bello, M.G., et al. (2010). Delivery mode shapes the acquisition and structure of the  
464 initial microbiota across multiple body habitats in newborns. *Proc Natl Acad Sci U S A*  
465 107, 11971-11975.
- 466 Esser, N., Paquot, N., and Scheen, A.J. (2015). Anti-inflammatory agents to treat or prevent  
467 type 2 diabetes, metabolic syndrome and cardiovascular disease. *Expert Opin Investig*  
468 *Drugs* 24, 283-307.
- 469 Fisher, K., and Phillips, C. (2009). The ecology, epidemiology and virulence of *Enterococcus*.  
470 *Microbiology* 155, 1749-1757.
- 471 Fulde, M., and Hornef, M.W. (2014). Maturation of the enteric mucosal innate immune system  
472 during the postnatal period. *Immunol Rev* 260, 21-34.
- 473 Garbe, J., et al. (2014). EndoE from *Enterococcus faecalis* hydrolyzes the glycans of the biofilm  
474 inhibiting protein lactoferrin and mediates growth. *PLoS One* 9, e91035.
- 475 Geva-Zatorsky, N., et al. (2017). Mining the Human Gut Microbiota for Immunomodulatory  
476 Organisms. *Cell* 168, 928-943.e911.
- 477 Green, M.R., and Sambrook, J. (2016). Preparation of Plasmid DNA by Alkaline Lysis with  
478 Sodium Dodecyl Sulfate: Minipreps. *Cold Spring Harbor Protocols* 2016,  
479 pdb.prot093344.
- 480 Hanahan, D. (1985). "Techniques for transformation of *E. coli*," in *DNA Cloning: a Practical*  
481 *Approach*, ed. D.M. Glover. (Oxford, United Kingdom: IRL Press), 109-135.

- 482 Hopkins, M.J., Macfarlane, G.T., Furrie, E., Fite, A., and Macfarlane, S. (2005).  
483 Characterisation of intestinal bacteria in infant stools using real-time PCR and northern  
484 hybridisation analyses. *FEMS Microbiology Ecology* 54, 77-85.
- 485 Im, J., et al. (2015). Enterococcus faecalis lipoteichoic acid suppresses Aggregatibacter  
486 actinomycetemcomitans lipopolysaccharide-induced IL-8 expression in human  
487 periodontal ligament cells. *Int Immunol* 27, 381-391.
- 488 Jimenez, E., et al. (2008). Assessment of the bacterial diversity of human colostrum and  
489 screening of staphylococcal and enterococcal populations for potential virulence factors.  
490 *Res Microbiol* 159, 595-601.
- 491 Kang, B.S., et al. (2009). Antimicrobial activity of enterocins from Enterococcus faecalis SL-5  
492 against Propionibacterium acnes, the causative agent in acne vulgaris, and its  
493 therapeutic effect. *J Microbiol* 47, 101-109.
- 494 Kirtzalidou, E.I., Mitsou, E.K., Pramateftaki, P., and Kyriacou, A. (2012). Screening Fecal  
495 Enterococci from Greek Healthy Infants for Susceptibility to Antimicrobial Agents.  
496 *Microbial Drug Resistance*.
- 497 Kozak, K., Charbonneau, D., Sanozky-Dawes, R., and Klaenhammer, T. (2015).  
498 Characterization of bacterial isolates from the microbiota of mothers' breast milk and  
499 their infants. *Gut Microbes* 6, 341-351.
- 500 Lane, D.S. (1990). "16S and 23S rRNA sequencing," in *Nucleic acid techniques in bacterial*  
501 *systematics.*, eds. E. Stackebrandt & M. Goodfellow. (New York, N.Y.: John Wiley ),  
502 115-148.
- 503 Lee, Y.J., Choi, H.J., Kang, T.W., Kim, H.O., Chung, M.J., and Park, Y.M. (2008). CBT-SL5, a  
504 bacteriocin from Enterococcus faecalis, suppresses the expression of interleukin-8  
505 induced by Propionibacterium acnes in cultured human keratinocytes. *J Microbiol*  
506 *Biotechnol* 18, 1308-1316.
- 507 Li, J., et al. (2014). An integrated catalog of reference genes in the human gut microbiome. *Nat*  
508 *Biotechnol* 32, 834-841.
- 509 Lin, X.B., et al. (2015). Genetic Determinants of Reutericyclin Biosynthesis in Lactobacillus  
510 reuteri. *Applied and Environmental Microbiology* 81, 2032-2041.
- 511 Ludwig, W., et al. (2004). ARB: a software environment for sequence data. *Nucleic Acids Res*  
512 32, 1363-1371.
- 513 Lyras, D., and Rood, J.I. (1998). Conjugative transfer of RP4-oriT shuttle vectors from  
514 Escherichia coli to Clostridium perfringens. *Plasmid* 39, 160-164.
- 515 Markowitz, V.M., et al. (2012). IMG: the Integrated Microbial Genomes database and  
516 comparative analysis system. *Nucleic Acids Res* 40, D115-122.
- 517 Martinez-Bueno, M., Valdivia, E., Galvez, A., and Maqueda, M. (2000). pS86, a new theta-  
518 replicating plasmid from Enterococcus faecalis. *Curr Microbiol* 41, 257-261.
- 519 Mazmanian, S.K., Liu, C.H., Tzianabos, A.O., and Kasper, D.L. (2005). An immunomodulatory  
520 molecule of symbiotic bacteria directs maturation of the host immune system. *Cell* 122,  
521 107-118.
- 522 Mcsweeney, C.S., Denman, S.E., and Mackie, R.I. (2005). "Rumen bacteria," in *Methods in gut*  
523 *microbial ecology for ruminants*, eds. H.P.S. Makkar & C.S. Mcsweeney. (Dordrecht:  
524 Springer), 23-37.
- 525 Meng, J., et al. (2012). A genome-wide inducible phenotypic screen identifies antisense RNA  
526 constructs silencing Escherichia coli essential genes. *FEMS Microbiol Lett* 329, 45-53.
- 527 Montealegre, M.C., La Rosa, S.L., Roh, J.H., Harvey, B.R., and Murray, B.E. (2015). The  
528 Enterococcus faecalis EbpA Pilus Protein: Attenuation of Expression, Biofilm  
529 Formation, and Adherence to Fibrinogen Start with the Rare Initiation Codon ATT.  
530 *MBio* 6, e00467-00415.

- 531 Nallapareddy, S.R., Qin, X., Weinstock, G.M., Hook, M., and Murray, B.E. (2000).  
532 *Enterococcus faecalis* adhesin, ace, mediates attachment to extracellular matrix proteins  
533 collagen type IV and laminin as well as collagen type I. *Infect Immun* 68, 5218-5224.
- 534 Nami, Y., Abdullah, N., Haghshenas, B., Radiah, D., Rosli, R., and Yari Khosroushahi, A.  
535 (2014). A newly isolated probiotic *Enterococcus faecalis* strain from vagina microbiota  
536 enhances apoptosis of human cancer cells. *Journal of Applied Microbiology* 117, 498-508.
- 537 Ng, S.C., et al. (2015). Environmental risk factors in inflammatory bowel disease: a population-  
538 based case-control study in Asia-Pacific. *Gut* 64, 1063-1071.
- 539 Noss, E.H., Nguyen, H.N., Chang, S.K., Watts, G.F.M., and Brenner, M.B. (2015). Genetic  
540 polymorphism directs IL-6 expression in fibroblasts but not selected other cell types.  
541 *Proceedings of the National Academy of Sciences* 112, 14948-14953.
- 542 Ó Cuív, P., et al. (2011). The effects from DNA extraction methods on the evaluation of  
543 microbial diversity associated with human colonic tissue. *Microbial Ecology* 61, 353-362.
- 544 Ó Cuív, P., et al. (2017). The gut bacterium and pathobiont *Bacteroides vulgatus* activates NF-  
545 kappaB in a human gut epithelial cell line in a strain and growth phase dependent  
546 manner. *Anaerobe* 47, 209-217.
- 547 Ó Cuív, P., et al. (2013). Draft Genome Sequence of *Enterococcus faecalis* PC1.1, a Candidate  
548 Probiotic Strain Isolated from Human Feces. *Genome Announcements* 1.
- 549 Ó Cuív, P., Smith, W.J., Pottenger, S., Burman, S., Shanahan, E.R., and Morrison, M. (2015).  
550 Isolation of genetically tractable most-wanted bacteria by metaparental mating.  
551 *Scientific Reports* 5, 13282.
- 552 Olmsted, S.B., Dunny, G.M., Erlandsen, S.L., and Wells, C.L. (1994). A plasmid-encoded  
553 surface protein on *Enterococcus faecalis* augments its internalization by cultured  
554 intestinal epithelial cells. *J Infect Dis* 170, 1549-1556.
- 555 Parks, D.H., Imelfort, M., Skennerton, C.T., Hugenholtz, P., and Tyson, G.W. (2015). CheckM:  
556 assessing the quality of microbial genomes recovered from isolates, single cells, and  
557 metagenomes. *Genome Research*.
- 558 Parks, D.H., et al. (2017). Recovery of nearly 8,000 metagenome-assembled genomes  
559 substantially expands the tree of life. *Nat Microbiol*.
- 560 Pavlova, S.I., Kilic, A.O., Topisirovic, L., Miladinov, N., Hatzos, C., and Tao, L. (2002).  
561 Characterization of a cryptic plasmid from *Lactobacillus fermentum* KC5b and its use  
562 for constructing a stable *Lactobacillus* cloning vector. *Plasmid* 47, 182-192.
- 563 Price, M.N., Dehal, P.S., and Arkin, A.P. (2010). FastTree 2 – Approximately Maximum-  
564 Likelihood Trees for Large Alignments. *PLOS ONE* 5, e9490.
- 565 Quevrain, E., et al. (2016). Identification of an anti-inflammatory protein from  
566 *Faecalibacterium prausnitzii*, a commensal bacterium deficient in Crohn's disease. *Gut*  
567 65, 415-425.
- 568 Renz-Polster, H., et al. (2005). Caesarean section delivery and the risk of allergic disorders in  
569 childhood. *Clin Exp Allergy* 35, 1466-1472.
- 570 Sakamoto, K., and Maeda, S. (2010). Targeting NF-kappaB for colorectal cancer. *Expert Opin*  
571 *Ther Targets* 14, 593-601.
- 572 Singh, K.V., La Rosa, S.L., Somarajan, S.R., Roh, J.H., and Murray, B.E. (2015). The  
573 fibronectin-binding protein EfbA contributes to pathogenesis and protects against  
574 infective endocarditis caused by *Enterococcus faecalis*. *Infect Immun* 83, 4487-4494.
- 575 Thurlow, L.R., Thomas, V.C., Fleming, S.D., and Hancock, L.E. (2009). *Enterococcus faecalis*  
576 capsular polysaccharide serotypes C and D and their contributions to host innate  
577 immune evasion. *Infect Immun* 77, 5551-5557.

- 578 **Van Baarlen, P., et al. (2009). Differential NF-kappaB pathways induction by *Lactobacillus***  
579 ***plantarum* in the duodenum of healthy humans correlating with immune tolerance. *Proc***  
580 ***Natl Acad Sci U S A* 106, 2371-2376.**
- 581 **Van Der Helm, E., Geertz-Hansen, H.M., Genee, H.J., Malla, S., and Sommer, M.O. (2015).**  
582 **deFUME: Dynamic exploration of functional metagenomic sequencing data. *BMC Res***  
583 ***Notes* 8, 328.**
- 584 **Vanek, N.N., Simon, S.I., Jacques-Palaz, K., Mariscalco, M.M., Dunny, G.M., and Rakita, R.M.**  
585 **(1999). Enterococcus faecalis aggregation substance promotes opsonin-independent**  
586 **binding to human neutrophils via a complement receptor type 3-mediated mechanism.**  
587 ***FEMS Immunol Med Microbiol* 26, 49-60.**
- 588 **Wang, S., Hibberd, M.L., Pettersson, S., and Lee, Y.K. (2014). Enterococcus faecalis from**  
589 **Healthy Infants Modulates Inflammation through MAPK Signaling Pathways. *PLOS***  
590 ***ONE* 9, e97523.**
- 591 **Wang, S., Ng, L.H., Chow, W.L., and Lee, Y.K. (2008). Infant intestinal *Enterococcus faecalis***  
592 **down-regulates inflammatory responses in human intestinal cell lines. *World Journal of***  
593 ***Gastroenterology* 14, 1067-1076.**
- 594 **Wopereis, H., Oozeer, R., Knipping, K., Belzer, C., and Knol, J. (2014). The first thousand days**  
595 **- intestinal microbiology of early life: establishing a symbiosis. *Pediatric Allergy and***  
596 ***Immunology* 25, 428-438.**
- 597 **Wyckoff, H.A., Barnes, M., Gillies, K.O., and Sandine, W.E. (1996). Characterization and**  
598 **sequence analysis of a stable cryptic plasmid from *Enterococcus faecium* 226 and**  
599 **development of a stable cloning vector. *Appl Environ Microbiol* 62, 1481-1486.**
- 600 **Zou, J., Baghdayan, A.S., Payne, S.J., and Shankar, N. (2014). A TIR domain protein from *E.***  
601 ***faecalis* attenuates MyD88-mediated signaling and NF-kappaB activation. *PLoS One* 9,**  
602 **e112010.**
- 603 **Zvanych, R., et al. (2014). Small molecule immunomodulins from cultures of the human**  
604 **microbiome member *Lactobacillus plantarum*. *J Antibiot* 67, 85-88.**
- 605

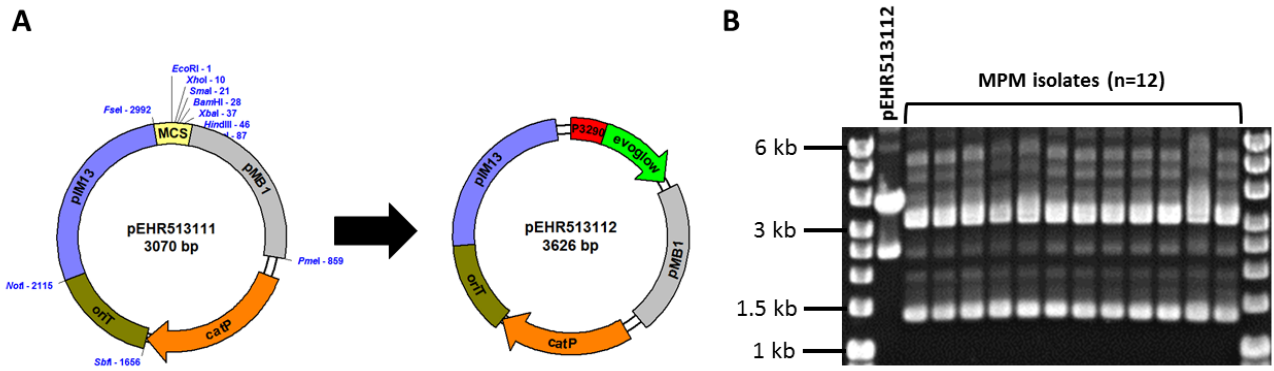

606

607

608

609

610

611

**Figure 1A.** The pEHR513111 plasmid carrying *catP* confers chloramphenicol resistance on its host. The pEHR513112 plasmid carries *evoglow-C-Bs2* under the control of the *C. phyofermentans* ISDg *cphy\_3290* promoter. **B.** Plasmid profiling of the transconjugants recovered by metaparental mating (MPM isolates). The pEHR513112 plasmid carried by the transconjugants was identified by comparison with plasmid DNA prepared from *E. coli* (pEHR513112).

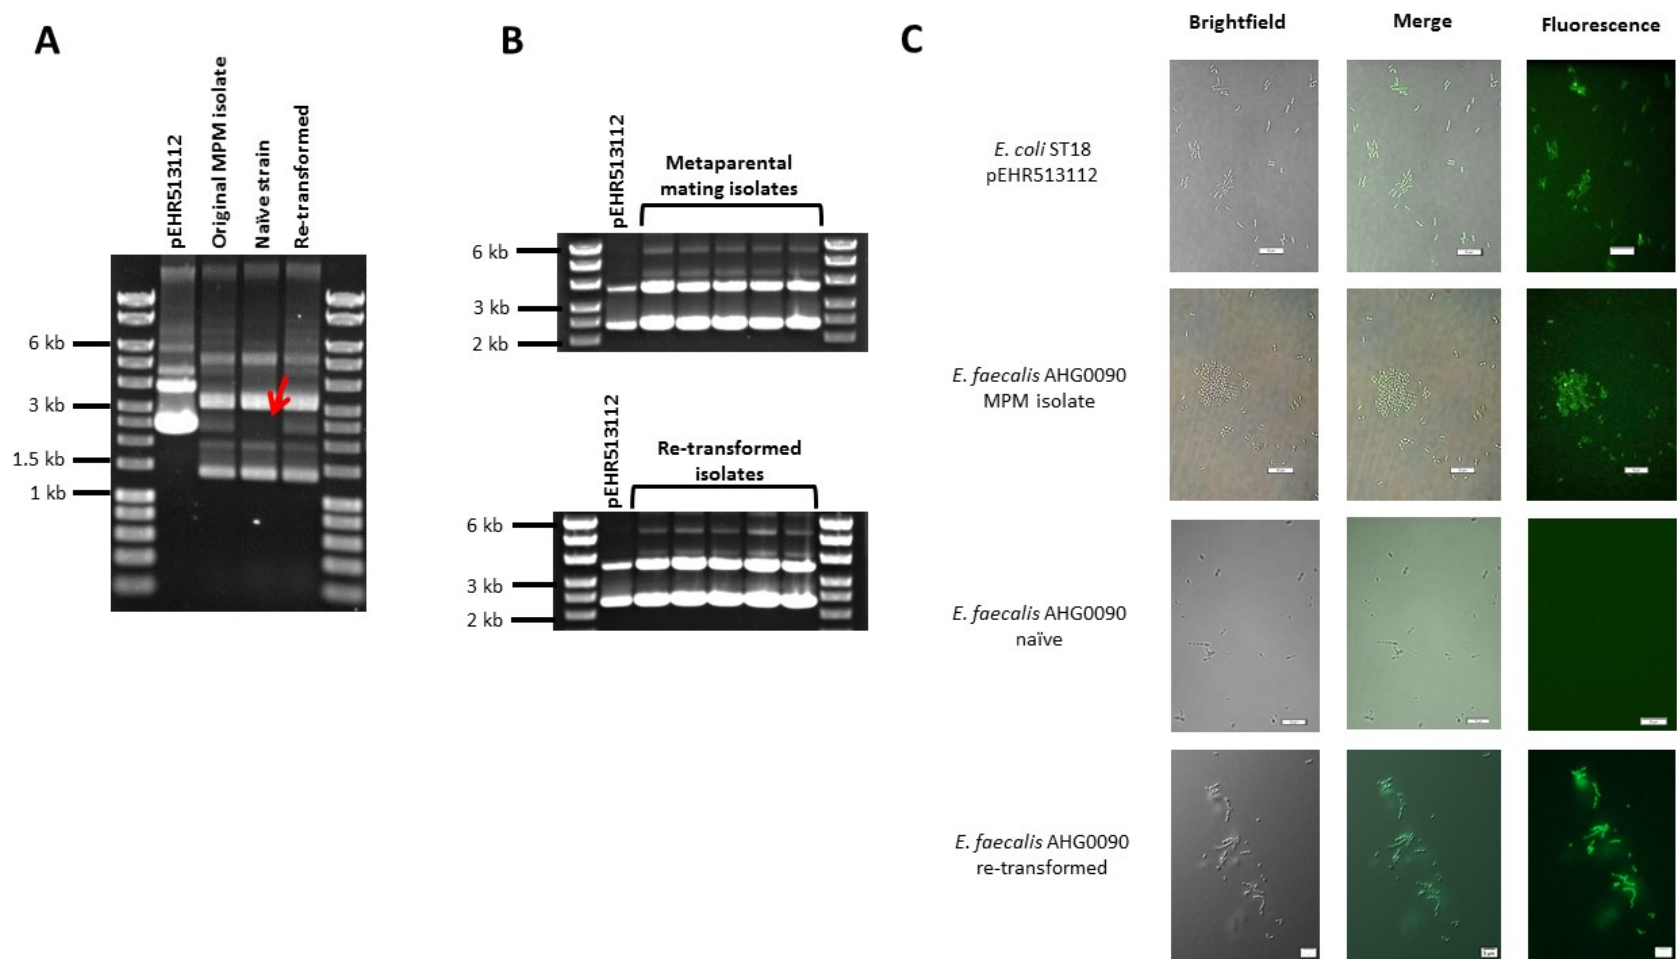

612

613 **Figure 2A.** *E. faecalis* AHG0090 is genetically tractable and can be manipulated using standard molecular microbiology approaches. The  
 614 pEHR513112 plasmid was readily identifiable in *E. faecalis* AHG0090 recovered by metaparental mating (original MPM isolate) and  
 615 following the re-introduction of the plasmid by biparental mating (re-transformed), but was lost following treatment with acridine orange  
 616 (naïve strain). The absence of pEHR513112 in the naïve strain is indicated by a red arrow. **B.** The pEHR513112 plasmid is stably maintained  
 617 in *E. faecalis* AHG0090. pEHR513112 plasmids recovered from *E. faecalis* AHG0090 transconjugants produced by metaparental mating and  
 618 following re-transformation of the naïve strain were examined by agarose gel electrophoresis to identify any major structural deletions and re-  
 619 arrangements. **C.** *E. faecalis* strains carrying pEHR513112 are fluorescent. *E. coli* ST18 carrying pEHR513112 and naïve and transconjugant  
 620 *E. faecalis* AHG0090 strains were analysed using brightfield and fluorescence microscopy. The scale bars represent 10 µm.



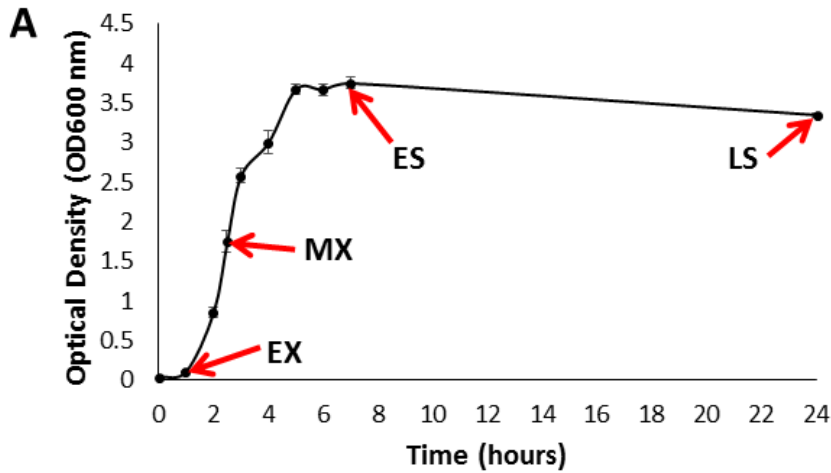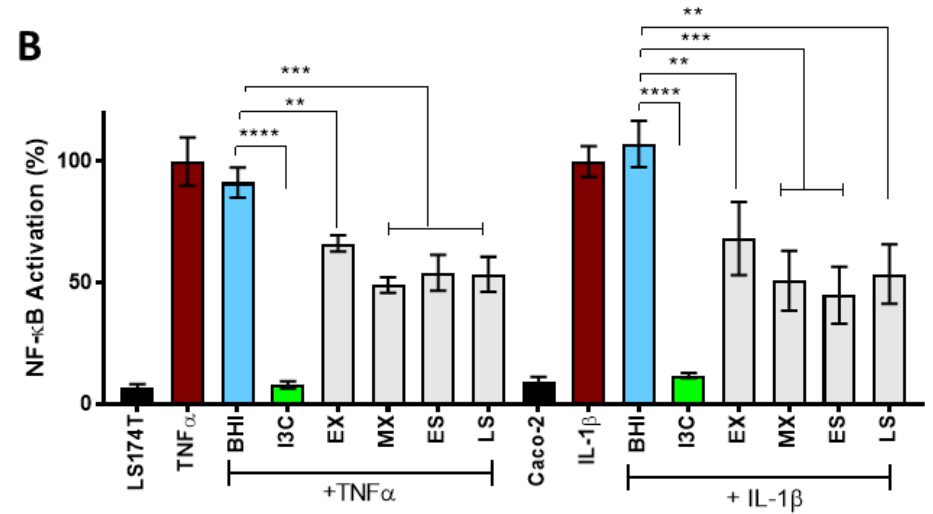

621

622 **Figure 3A.** Harvesting of *E. faecalis* AHG0090 cell-free culture supernatants. *E. faecalis* AHG0090 was cultured in BHI medium and culture  
 623 supernatants were harvested in early exponential (EX), mid-exponential (MX), early stationary (ES) and late stationary (LS) phase. Growth  
 624 was recorded as the change in optical density over time (hours). **B.** Characterisation of the NF- $\kappa$ B suppressive capacity of *E. faecalis*  
 625 AHG0090. The effects of the *E. faecalis* AHG0090 culture supernatants on NF- $\kappa$ B activation in the LS174T-NF- $\kappa$ B $luc$  and Caco-2-NF- $\kappa$ B $luc$   
 626 reporter cell lines were measured by the luciferase assay. The extent of NF- $\kappa$ B activation was assessed after 6 hours stimulation with IL-1 $\beta$   
 627 and baseline suppression of the reporter gene was assessed using sterile BHI medium (\*\*  $p < 0.01$ , \*\*\*  $p < 0.001$ , \*\*\*\*  $p < 0.0001$  as determined  
 628 by one-way ANOVA with Dunnett's multiple comparison test).

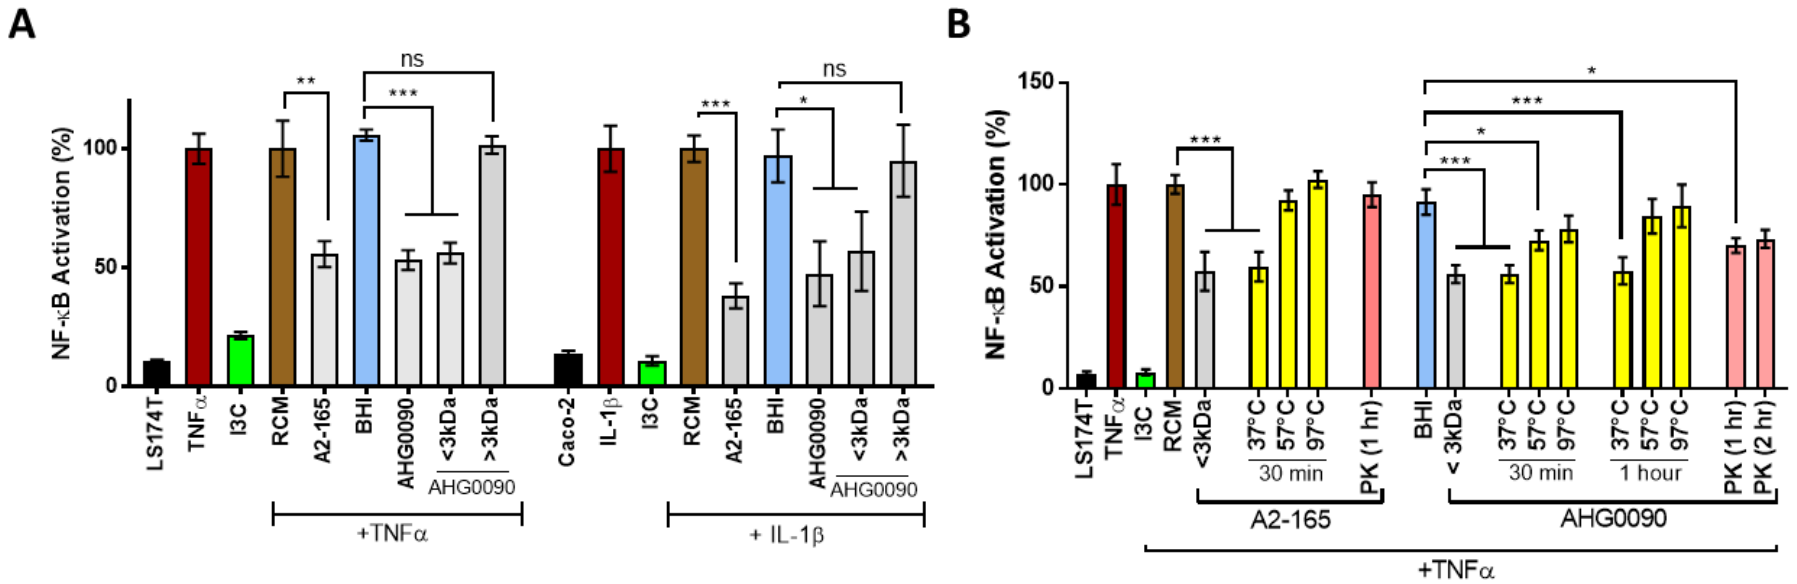

629

630 **Figure 4A.** *F. prausnitzii* A2-165 and *E. faecalis* AHG0090 produce low molecular weight NF-κB suppressive bioactives. The extent of NF-  
631 κB activation was assessed after 6 hours stimulation of the LS174T-NF-κBluc and Caco-2-NF-κBluc reporter cell lines with TNF $\alpha$  and IL-1 $\beta$   
632 respectively. Baseline suppression of the reporter gene was assessed using sterile RCM or BHI medium. The suppressive effects of the  
633 supernatants were assessed against the appropriate medium control. **B.** *F. prausnitzii* A2-165 and *E. faecalis* AHG0090 produce heat and  
634 proteinase K labile bioactives. The effect of the heat and proteinase K treatments was assessed using the LS174T-NF-κBluc reporter cell line.  
635 The suppressive effects of the supernatants were assessed against the appropriate medium control and significant differences are indicated. ns  
636 not significant, \*  $p < 0.05$ , \*\*  $p < 0.01$ , \*\*\*  $p < 0.001$ , \*\*\*\*  $p < 0.0001$  as determined by one-way ANOVA with Dunnett's multiple comparison  
637 test.

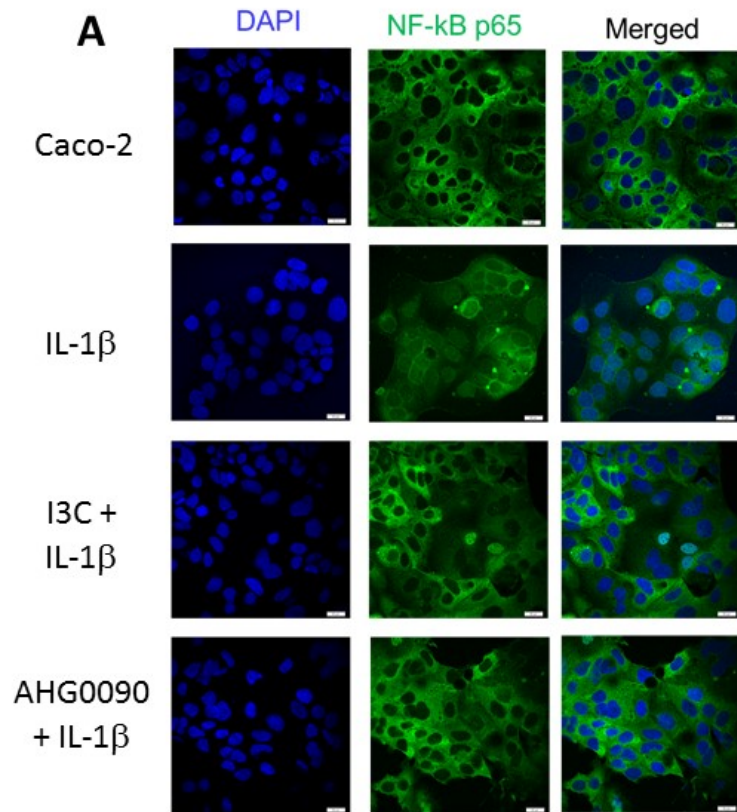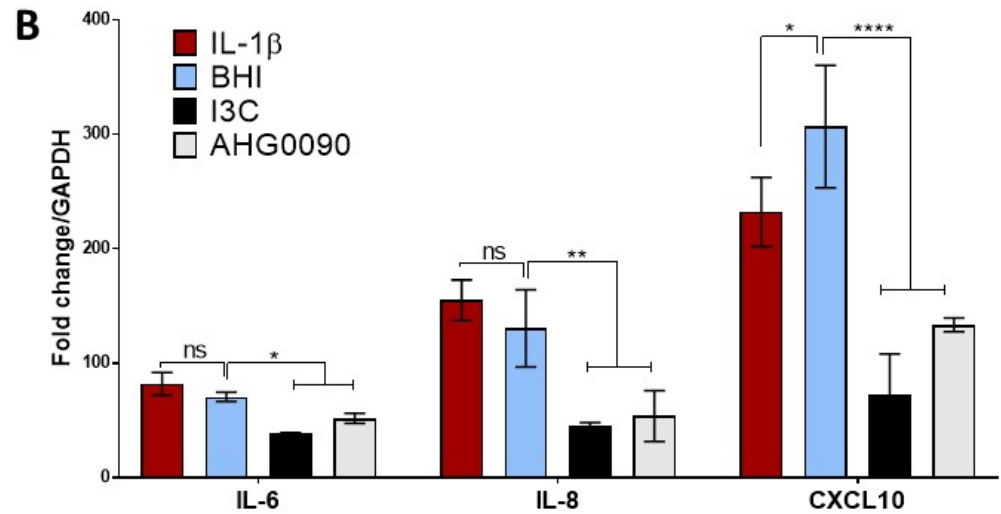

638

639 **Figure 5A.** *E. faecalis* AHG0090 mid-exponential phase culture supernatant suppresses NF-κB-p65 subunit nuclear translocation. The cell  
 640 nuclei and NF-κB-p65 subunit are shown in blue and green respectively. The nuclei for the BHI treated Caco-2 cells in the central panel are  
 641 largely black revealing that treatment does not result in nuclear translocation. As expected, BHI treatment does not prevent NF-κB-p65 nuclear  
 642 translocation following IL-1β treatment as indicated by green staining of the nuclei. In contrast, treatment with I3C and *E. faecalis* AHG0090  
 643 mid-exponential phase culture supernatant suppressed IL-1β induced NF-κB-p65 nuclear translocation. The scale bars represent 10 μm. **B.**  
 644 *E. faecalis* AHG0090 mid-exponential phase culture supernatants suppress expression of NF-κB-p65 dependent cytokines. The expression of  
 645 IL-6, IL-8 and CXCL10 was assessed by qRT-PCR. The data are normalized to GAPDH gene expression and presented as the fold-change  
 646 relative to unstimulated cells. *E. faecalis* AHG0090 mid-exponential phase culture supernatants suppress expression of IL-6 (\**p*<0.05), IL-8  
 647 (\*\**p*<0.01) and CXCL10 (\*\*\*\**p*<0.0001) as determined using one-way ANOVA with Dunnett's multiple comparison test.

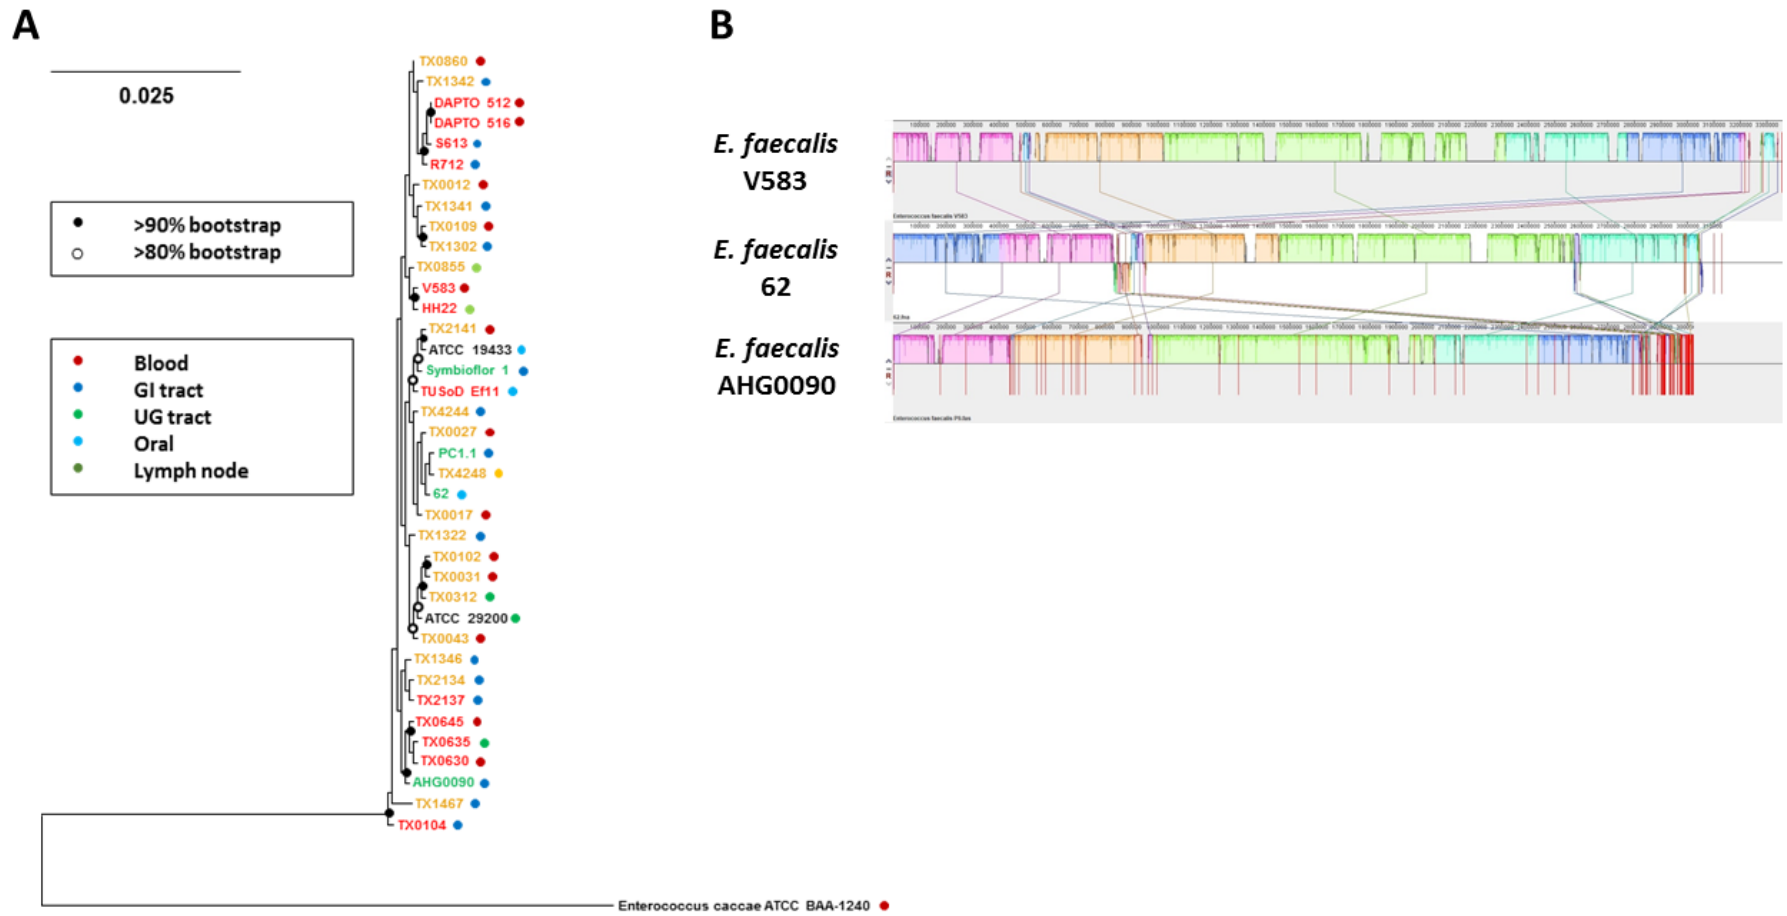

648

649 **Figure 6A.** GTDB based phylogeny of *E. faecalis* as determined from the concatenation of 120 universal bacterial-specific marker genes.  
 650 The source of individual commensal (green), uncharacterised (orange) and pathogenic (red) strains is indicated. The bootstrap values are  
 651 indicated using a cut-off of >80 or >90%. **B.** The extent of genome synteny between *E. faecalis* AHG0090 and a representative pathogenic  
 652 strain (*E. faecalis* V583) and commensal (*E. faecalis* 62) that have closed genome sequences. The red lines for *E. faecalis* V583 and 62  
 653 indicated boundaries of the chromosomes and plasmids whereas the red lines for *E. faecalis* AHG0090 indicate individual contig sequences.
